# Supplementary material
Source: PubMed Central journal article supplement (PMC11146290)
Supplement: NIHMS1957700-supplement-Online_supplement.pdf [file NIHMS1957700-supplement-Online_supplement.pdf]

## Supplementary Material\*

Pepper DJ, Jaswal D, Sun J, Welsh J, Natanson C, Eichacker PQ. Evidence underpinning the U.S. government–mandated hemodynamic interventions for sepsis. A systematic review. *Ann Intern Med*. 2018. doi:10.7326/M17-2947

|                                                                                                                                                           | <b>Page</b> |
|-----------------------------------------------------------------------------------------------------------------------------------------------------------|-------------|
| <b>Database search</b>                                                                                                                                    | 1           |
| <b>Data extraction tool</b>                                                                                                                               | 6           |
| <b>Supplement Table 1:</b> Evaluation of quantity, quality, and consistency of body of evidence for structure, process, and intermediate outcome measures | 13          |
| <b>Supplement Table 2:</b> Study characteristics                                                                                                          | 14          |
| <b>Supplement Table 3:</b> Summary of whether gender, co-morbidities and illness severity were reported in both the intervention and control arms         | 15          |
| <b>Supplement Table 4:</b> Summary of treatments employed in studies                                                                                      | 16          |
| <b>Supplement Table 5:</b> Treatments and/or measurements compared in intervention and control groups                                                     | 17          |
| <b>Supplement Table 6:</b> Summary of the outcomes reported in analyzed studies                                                                           | 21          |
| <b>Supplement Table 7:</b> Adjunctive aids                                                                                                                | 23          |
| <b>Supplement Table 8:</b> Risk of bias assessment for analyzed studies                                                                                   | 24          |
| <b>Supplement Table 9:</b> Reported organ dysfunction at baseline and administered intervention in SEP-1 study                                            | 26          |
| <b>Supplement Table 10:</b> Summary of studies registered in clinicaltrials.gov that address SEP-1 individual interventions                               | 27          |
| <b>Protocol:</b> PROSPERO 2016:CRD42016052716                                                                                                             | 28          |

\* This supplementary material was provided by the authors to give readers further details on their article. The material was reviewed but not copyedited.

## Database search

**Total: 56,563 records**

**Search 1: 51,935 total records** [46,498 records (2/7/17) and 5,437 records (updated 11/28/17)]

**Search 2: 4,628 total records** [3,780 records (2/7/17) and 848 records (updated 11/28/17)]

**Initial search (2/7/17): 50,278 records**

**Updated search (11/28/17): 6,285 records**

### Search 1: 51,935 records

**PUBMED:** 11,393 records (2/7/17) and 2,099 records (11/28/17)

*(sepsis[majr] OR sepsis[tiab] OR septic[tiab] OR septicemia[tiab]) AND (physical examination[mesh] OR "physical examination"[tiab] OR "vital signs"[tiab] OR "heart rate"[tiab] OR "blood pressure"[tiab] OR "arterial pressure"[tiab] OR respiration[mesh] OR "respiratory rate"[tiab] OR "cardiopulmonary examination"[tiab] OR "cardiovascular examination"[tiab] OR "cardiac examination"[tiab] OR pulmonary edema[mesh] OR "pulmonary edema"[tiab] OR jugular veins[mesh] OR "jugular vein"[tiab] OR "jugular veins"[tiab] OR "pulmonary congestion"[tiab] OR "shock index"[tiab] OR "capillary refill"[tiab] OR skin temperature[mesh] OR "skin temperature"[tiab] OR "skin color"[tiab] OR "peripheral circulation"[tiab] OR pulse[tiab] OR skin/blood supply[mesh] OR mottling[tiab] OR mottled[tiab]) NOT "Animals"[Mesh:NoExp] NOT pig NOT pigs NOT swine NOT rat NOT rats NOT mouse NOT mice NOT dog NOT dogs NOT prenatal NOT infant NOT infants NOT neonatal NOT newborn NOT baby NOT babies NOT child NOT children NOT pediatric NOT pediatrics (5185 citations)*

*(sepsis[majr] OR sepsis[tiab] OR septic[tiab] OR septicemia[tiab]) AND ("goal directed"[tiab] OR ultrasound[tiab] OR ultrasonography[mesh] OR ultrasonography[tiab] OR echocardiography[mesh] OR echocardiography[tiab] OR heart ventricles[mesh] OR "heart ventricles"[tiab] OR ventricular function[mesh] OR "ventricular function"[tiab] OR ventricular dysfunction[mesh] OR "ventricular dysfunction"[tiab] OR venae cavae[mesh] OR "vena cava"[tiab] OR "caval index"[tiab] OR stroke volume[mesh] OR "stroke volume"[tiab] OR cardiac output[mesh] OR "cardiac output"[tiab] OR cardiac volume[mesh] OR "cardiac volume"[tiab] OR blood flow velocity[mesh] OR "blood flow velocity"[tiab] OR "speckle tracking"[tiab] OR "leg raise"[tiab] OR fluid therapy[mesh] OR "fluid therapy"[tiab] OR "fluid challenge"[tiab] OR "fluid titration"[tiab] OR "volume expansion"[tiab] OR "volume administration"[tiab] OR doppler[tiab] OR plethysmography[mesh] OR plethysmography[tiab] OR bioimpedance[tiab] OR bioreactance[tiab]) NOT "Animals"[Mesh:NoExp] NOT pig NOT pigs NOT swine NOT rat NOT rats NOT mouse NOT mice NOT dog NOT dogs NOT prenatal NOT infant NOT infants NOT neonatal NOT newborn NOT baby NOT babies NOT child NOT children NOT pediatric NOT pediatrics (5434 citations)*

*(sepsis[majr] OR sepsis[tiab] OR septic[tiab] OR septicemia[tiab]) AND (lactates/blood[mesh] OR lactate[tiab] OR lactates[tiab] OR lactic acid/blood[mesh] OR "lactic acid"[tiab] OR vasoconstrictor agents/therapeutic use[mesh] OR vasoconstrictor[tiab] OR vasoconstrictors[tiab] OR vasopressor[tiab] OR vasopressors[tiab] OR vascular resistance/drug effects[mesh] OR "vascular resistance"[tiab] OR "fluid bolus"[tiab] OR fluid therapy[mesh] OR "fluid therapy"[tiab] OR "30cc/kg"[tiab] OR "30ml/kg"[tiab] OR crystalloid solutions[nm] OR "crystalloid solution"[tiab] OR "crystalloid solutions"[tiab] OR "ringer's lactate"[tiab] OR "sodium chloride"[tiab] OR adrenaline[tiab] OR amrinone/therapeutic use[mesh] OR amrinone[tiab] OR dobutamine/therapeutic use[mesh] OR dobutamine[tiab] OR dopamine/therapeutic use[mesh] OR dopamine[tiab] OR epinephrine/therapeutic use[mesh] OR epinephrine[tiab] OR*

*inotrope[tiab] OR inotropes[tiab] OR milrinone/therapeutic use[mesh] OR milrinone[tiab] OR nitroprusside/therapeutic use[mesh] OR nitroprusside[tiab] OR norepinephrine/therapeutic use[mesh] OR norepinephrine[tiab] OR noradrenaline[tiab] OR "nor-adrenaline"[tiab] OR phenylephrine/therapeutic use[mesh] OR phenylephrine[tiab]) NOT "Animals"[Mesh:NoExp] NOT pig NOT pigs NOT swine NOT rat NOT rats NOT mouse NOT mice NOT dog NOT dogs NOT prenatal NOT infant NOT infants NOT neonatal NOT newborn NOT baby NOT babies NOT child NOT children NOT pediatric NOT pediatrics (4323 citations)*

**EMBASE:** 21,326 records (2/7/17) and 1,609 records (11/28/17)

*'sepsis'/exp/mj OR sepsis:ab,ti OR septic:ab,ti OR septicemia:ab,ti AND ('physical examination'/exp/mj OR 'physical examination':ab,ti OR 'vital sign'/exp/mj OR 'vital signs':ab,ti OR 'heart rate'/exp/mj OR 'heart rate':ab,ti OR 'blood pressure'/exp/mj OR 'blood pressure':ab,ti OR 'arterial pressure'/exp/mj OR 'arterial pressure':ab,ti OR 'breathing'/exp/mj OR 'breathing rate'/exp/mj OR 'respiratory rate':ab,ti OR 'body temperature'/exp/mj OR 'body temperature measurement'/exp/mj OR 'body temperature monitoring'/exp/mj OR 'body temperature':ti,ab OR 'cardiovascular system examination'/exp/mj OR 'cardiovascular examination':ab,ti OR 'cardiopulmonary examination':ab,ti OR 'cardiac examination':ab,ti OR 'lung edema'/exp/mj OR 'pulmonary edema':ab,ti OR 'jugular vein'/exp/mj OR 'jugular vein':ab,ti OR 'jugular veins':ab,ti OR 'lung congestion'/exp/mj OR 'pulmonary congestion':ab,ti OR 'shock index':ab,ti OR 'capillary refill':ab,ti OR 'skin temperature'/exp/mj OR 'skin temperature':ab,ti OR 'skin color'/exp/mj OR 'skin color':ab,ti OR 'peripheral circulation'/exp/mj OR 'peripheral circulation':ab,ti OR 'skin blood flow'/exp/mj OR 'pulse rate'/exp/mj OR pulse:ab,ti OR mottling:ab,ti OR mottled:ab,ti) NOT prenatal NOT infant NOT infants NOT neonatal NOT newborn NOT baby NOT babies NOT child NOT children NOT pediatric NOT pediatrics AND [humans]/lim (6967 citations)*

*'sepsis'/exp/mj OR sepsis:ti,ab OR septic:ti,ab OR septicemia:ti,ab AND ('goal directed':ti,ab OR 'ultrasound'/exp/mj OR ultrasound:ti,ab OR 'echography'/exp/mj OR ultrasonography:ti,ab OR 'echocardiography'/exp/mj OR echocardiography:ti,ab OR 'heart ventricle'/exp/mj OR 'heart ventricles':ti,ab OR 'heart ventricle function'/exp/mj OR 'ventricular function':ti,ab OR 'ventricular dysfunction':ti,ab OR 'cava vein'/exp/mj OR 'vena cava':ti,ab OR 'caval index':ti,ab OR 'heart stroke volume'/exp/mj OR 'stroke volume':ti,ab OR 'heart output'/exp/mj OR 'cardiac output':ti,ab OR 'heart volume'/exp/mj OR 'cardiac volume':ti,ab OR 'blood flow velocity'/exp/mj OR 'blood flow velocity':ti,ab OR 'speckle tracking echocardiography'/exp/mj OR 'speckle tracking':ti,ab OR 'leg raise':ti,ab OR 'fluid therapy'/exp/mj OR 'fluid therapy':ti,ab OR 'fluid challenge':ti,ab OR 'fluid titration':ti,ab OR 'volume expansion':ti,ab OR 'volume administration':ti,ab OR doppler:ti,ab OR 'plethysmography'/exp/mj OR plethysmography:ti,ab OR bioimpedance:ti,ab OR bioreactance:ti,ab) NOT prenatal NOT infant NOT infants NOT neonatal NOT newborn NOT baby NOT babies NOT child NOT children NOT pediatric NOT pediatrics AND [humans]/lim (7145 citations)*

*'sepsis'/exp/mj OR sepsis:ab,ti OR septic:ab,ti OR septicemia:ab,ti AND ('lactic acid derivative'/exp/mj OR lactate:ti,ab OR lactates:ti,ab OR 'lactic acid'/exp/mj OR 'lactic acid':ti,ab OR 'vasoconstrictor agent'/exp/mj OR vasoconstrictor:ti,ab OR vasoconstrictors:ti,ab OR vasopressor:ti,ab OR vasopressors:ti,ab OR 'vascular resistance'/exp/mj OR 'vascular resistance':ti,ab OR 'fluid bolus':ti,ab OR 'fluid therapy'/exp/mj OR 'fluid therapy':ti,ab OR '30cc/kg':ti,ab OR '30ml/kg':ti,ab OR 'crystalloid'/exp/mj OR 'crystalloid solution':ti,ab OR 'crystalloid solutions':ti,ab OR 'ringer lactate':ti,ab OR 'sodium chloride':ti,ab OR 'adrenalin'/exp/mj OR adrenaline:ti,ab OR 'amrinone'/exp/mj OR*

*amrinone:ti,ab OR 'dobutamine'/exp/mj OR dobutamine:ti,ab OR 'dopamine'/exp/mj OR dopamine:ti,ab OR epinephrine:ti,ab OR inotrope:ti,ab OR inotropes:ti,ab OR 'milrinone'/exp/mj OR milrinone:ti,ab OR 'nitroprusside sodium'/exp/mj OR nitroprusside:ti,ab OR 'noradrenalin'/exp/mj OR norepinephrine:ti,ab OR noradrenaline:ti,ab OR 'nor-adrenaline':ti,ab OR 'phenylephrine'/exp/mj OR phenylephrine:ti,ab) NOT prenatal NOT infant NOT infants NOT neonatal NOT newborn NOT baby NOT babies NOT child NOT children NOT pediatric NOT pediatrics AND [humans]/lim (7214 citations)*

**SCOPUS:** 9,813 records (2/7/17) and 1,443 records (11/28/17)

*TITLE-ABS (sepsis OR septic OR septicemia ) AND TITLE-ABS ( "physical examination" OR "vital signs" OR "heart rate" OR "blood pressure" OR "arterial pressure" OR "respiratory rate" OR "cardiopulmonary examination" OR "cardiovascular examination" OR "cardiac examination" OR "pulmonary edema" OR "jugular vein" OR "jugular veins" OR "pulmonary congestion" OR "shock index" OR "capillary refill" OR "skin temperature" OR "skin color" OR "peripheral circulation" OR pulse OR mottling OR mottled OR "goal directed" OR ultrasound OR ultrasonography OR echocardiography OR "heart ventricles" OR "ventricular function" OR "ventricular dysfunction" OR "vena cava" OR "caval index" OR "stroke volume" OR "cardiac output" OR "cardiac volume" OR "blood flow velocity" OR "speckle tracking" OR "leg raise" OR "fluid challenge" OR "fluid titration" OR "volume expansion" OR "volume administration" OR doppler OR plethysmography OR bioimpedance OR bioreactance )*

*TITLE-ABS (sepsis OR septic OR septicemia ) AND TITLE-ABS (lactate OR lactates OR "lactic acid" OR vasoconstrictor OR vasoconstrictors OR vasopressor OR vasopressors OR "vascular resistance" OR "fluid bolus" OR "fluid therapy" OR "30cc/kg" OR "30ml/kg" OR "crystalloid solution" OR "crystalloid solutions" OR "ringer's lactate" OR "sodium chloride" OR adrenaline OR amrinone OR dobutamine OR dopamine OR epinephrine OR inotrope OR inotropes OR milrinone OR nitroprusside OR norepinephrine OR noradrenaline OR "nor-adrenaline" OR phenylephrine)*

*( TITLE-ABS (sepsis OR septic OR septicemia ) AND TITLE-ABS ( "physical examination" OR "vital signs" OR "heart rate" OR "blood pressure" OR "arterial pressure" OR "respiratory rate" OR "cardiopulmonary examination" OR "cardiovascular examination" OR "cardiac examination" OR "pulmonary edema" OR "jugular vein" OR "jugular veins" OR "pulmonary congestion" OR "shock index" OR "capillary refill" OR "skin temperature" OR "skin color" OR "peripheral circulation" OR pulse OR mottling OR mottled OR "goal directed" OR ultrasound OR ultrasonography OR echocardiography OR "heart ventricles" OR "ventricular function" OR "ventricular dysfunction" OR "vena cava" OR "caval index" OR "stroke volume" OR "cardiac output" OR "cardiac volume" OR "blood flow velocity" OR "speckle tracking" OR "leg raise" OR "fluid challenge" OR "fluid titration" OR "volume expansion" OR "volume administration" OR doppler OR plethysmography OR bioimpedance OR bioreactance ) ) OR ( TITLE-ABS (sepsis OR septic OR septicemia ) AND TITLE-ABS ( lactate OR lactates OR "lactic acid" OR vasoconstrictor OR vasoconstrictors OR vasopressor OR vasopressors OR "vascular resistance" OR "fluid bolus" OR "fluid therapy" OR "30cc/kg" OR "30ml/kg" OR "crystalloid solution" OR "crystalloid solutions" OR "ringer's lactate" OR "sodium chloride" OR adrenaline OR amrinone OR dobutamine OR dopamine OR epinephrine OR inotrope OR inotropes OR milrinone OR nitroprusside OR norepinephrine OR noradrenaline OR "nor-*

*adrenaline" OR phenylephrine)) AND ( EXCLUDE ( EXACTKEYWORD , "Nonhuman" ) OR EXCLUDE ( EXACTKEYWORD , "Animals" ) OR EXCLUDE ( EXACTKEYWORD , "Animal Experiment" ) OR EXCLUDE ( EXACTKEYWORD , "Animal Model" ) OR EXCLUDE ( EXACTKEYWORD , "Animal" ) OR EXCLUDE ( EXACTKEYWORD , "Rat" ) OR EXCLUDE ( EXACTKEYWORD , "Rats" ) OR EXCLUDE ( EXACTKEYWORD , "Infant" ) OR EXCLUDE ( EXACTKEYWORD , "Infant, Newborn" ) OR EXCLUDE ( EXACTKEYWORD , "Newborn" ) OR EXCLUDE ( EXACTKEYWORD , "Disease Models, Animal" ) OR EXCLUDE ( EXACTKEYWORD , "Child, Preschool" ) OR EXCLUDE ( EXACTKEYWORD , "Rats, Sprague-Dawley" ) OR EXCLUDE ( EXACTKEYWORD , "Swine" ) OR EXCLUDE ( EXACTKEYWORD , "Preschool Child" ) OR EXCLUDE ( EXACTKEYWORD , "Pregnancy" ) )*

**WEB OF SCIENCE CORE COLLECTION:** 1,952 records (2/7/17) and 206 records (11/28/17)

*TITLE: (sepsis OR septic OR septicemia) AND TITLE: ("physical examination" OR "vital signs" OR "heart rate" OR "blood pressure" OR "arterial pressure" OR "respiratory rate" OR "cardiopulmonary examination" OR "cardiovascular examination" OR "cardiac examination" OR "pulmonary edema" OR "jugular vein" OR "jugular veins" OR "pulmonary congestion" OR "shock index" OR "capillary refill" OR "skin temperature" OR "skin color" OR "peripheral circulation" OR pulse OR mottling OR mottled OR "goal directed" OR ultrasound OR ultrasonography OR echocardiography OR "heart ventricles" OR "ventricular function" OR "ventricular dysfunction" OR "vena cava" OR "caval index" OR "stroke volume" OR "cardiac output" OR "cardiac volume" OR "blood flow" OR "speckle tracking" OR "leg raise" OR fluid OR fluids OR "volume expansion" OR "volume administration" OR doppler OR plethysmography OR bioimpedance OR bioreactance) NOT TOPIC: (pig OR pigs OR swine OR rat OR rats OR mouse OR mice OR dog OR dogs OR prenatal OR infant OR infants OR neonatal OR newborn OR baby OR babies OR child OR children OR pediatric OR pediatrics) (1220 citations)*

*TITLE: (sepsis OR septic OR septicemia) AND TITLE: (lactate OR lactates OR "lactic acid" OR vasoconstrictor OR vasoconstrictors OR vasopressor OR vasopressors OR "vascular resistance" OR "fluid bolus" OR "fluid therapy" OR "30cc/kg" OR "30ml/kg" OR "crystalloid solution" OR "crystalloid solutions" OR "ringer's lactate" OR "sodium chloride" OR adrenaline OR amrinone OR dobutamine OR dopamine OR epinephrine OR inotrope OR inotropes OR milrinone OR nitroprusside OR norepinephrine OR noradrenaline OR "nor-adrenaline" OR phenylephrine) NOT TOPIC: (pig OR pigs OR swine OR rat OR rats OR mouse OR mice OR dog OR dogs OR prenatal OR infant OR infants OR neonatal OR newborn OR baby OR babies OR child OR children OR pediatric OR pediatrics)*

**Clinical trials.gov:** 2,014 records (2/7/17) and 80 records (11/28/17)

*Sepsis OR Septic shock*

## **Search 2: 4,628 records**

**PubMed:** 1,497 records (2/7/17) and 335 records (11/28/17)

*(sepsis[majr] OR sepsis[tiab] OR septic[tiab] OR septicemia[tiab]) AND ("sepsis bundle"[tiab] OR bundle[ti] OR "sepsis bundles"[tiab] OR bundles[ti] OR "sepsis protocol"[tiab] OR protocol[ti] OR "sepsis protocols"[tiab] OR protocols[ti] OR "surviving sepsis"[tiab] OR "Guideline Adherence"[Majr] OR guideline[ti] OR guidelines[ti]) NOT "Animals"[Mesh:NoExp]*

**EMBASE:** 1,155 records (2/7/17) and 232 records (11/28/17)

*'sepsis'/exp/mj OR sepsis:ti,ab OR septic:ti,ab OR septicemia:ti,ab AND ('sepsis bundle':ti,ab OR bundle:ti OR 'sepsis bundles':ti,ab OR bundles:ti OR 'sepsis protocol':ti,ab OR protocol:ti OR 'sepsis protocols':ti,ab OR protocols:ti OR 'surviving sepsis':ti,ab OR 'protocol compliance'/exp/mj OR guideline:ti OR guidelines:ti) AND ([article]/lim OR [article in press]/lim OR [erratum]/lim OR [review]/lim) AND [humans]/lim*

**Scopus:** 841 records (2/7/17) and 190 records (11/28/17)

*TITLE-ABS ( sepsis OR septic OR septicemia ) AND TITLE-ABS ("sepsis bundle" OR "sepsis bundles" OR "sepsis protocol" OR "sepsis protocols" OR "surviving sepsis campaign" OR "surviving sepsis guidelines" ) AND ( EXCLUDE(EXACTKEYWORD,"Nonhuman" ) ) AND ( LIMIT-TO(DOCTYPE,"ar" ) OR LIMIT-TO(DOCTYPE,"re" ) OR LIMIT-TO(DOCTYPE,"ip" ) OR LIMIT-TO(DOCTYPE,"er" ) )*

*TITLE ( sepsis OR septic OR septicemia ) AND TITLE (bundle OR bundles OR protocol OR protocols OR "surviving sepsis" ) AND ( EXCLUDE(EXACTKEYWORD,"Nonhuman" ) ) AND ( LIMIT-TO(DOCTYPE,"ar" ) OR LIMIT-TO(DOCTYPE,"re" ) OR LIMIT-TO(DOCTYPE,"ip" ) OR LIMIT-TO(DOCTYPE,"er" ) )*

**Web of Science:** 287 records (2/7/17) and 91 records (11/28/17)

*TITLE: (sepsis OR septic OR septicemia) AND TITLE: (bundle OR bundles OR protocol OR protocols OR "surviving sepsis" OR guideline OR guidelines)*

*Refined by: DOCUMENT TYPES: ( ARTICLE OR CORRECTION OR REVIEW )*

*Timespan: All years. Indexes: SCI-EXPANDED.*

## **Data extraction tool**

### **Section 1. Study Design**

1. Last name of first author/ year of publication
2. Prospective vs. Retrospective
3. Observational vs. Interventional
4. Study Period
5. Region/ Country study was conducted
6. Number of study sites
7. Study location (ED, ICU or both)
8. Number of patients enrolled
9. Use a consensus definition of sepsis, severe sepsis, septic shock (Yes [Y], No [N])

If yes, specify definition:

If no, specify sepsis definition used:

10. Inclusion criteria
11. Exclusion criteria
12. Primary endpoint
13. Secondary endpoints
14. Mortality definition

**Section 2. Study Characteristics**

1. Age: Mean (SD) or Median (IQR) reported (Yes [Y], No [N])
2. Sex: frequency (%) reported (Yes [Y], No [N])
3. Co-morbidities at admission
  - a. Frequency reported across groups reported (Yes [Y], No [N])
    - i. COPD
    - ii. CHF
    - iii. HTN
    - iv. Renal disease
    - v. DM
    - vi. Liver disease
    - vii. Immunocompromised (HIV, Steroids, Chemotherapy, Malignancy)
4. Illness severity at baseline across groups (Yes [Y], No [N])

If yes, specify which severity scores were used: \_\_\_\_\_
5. Site of infection reported (Yes [Y], No [N])
6. Reports percentage of patients with positive blood cultures (Yes [Y], No [N])
7. Reports percentage of patients requiring source control (Yes [Y], No [N])
8. Reports percentage of patient who had baseline serum lactate measured (Yes [Y], No [N])
9. Reports baseline BP (Yes [Y], No [N])
10. Reports mechanical ventilation at baseline (Yes [Y], No [N])
11. Baseline imbalances exist (Yes [Y], No [N])
12. List baseline imbalances if present

- 
- 
- 
- 
- 
- 
- 
-



### **Section 3. Study Outcomes**

1. Reports survival (Yes [Y], No [N])

2. Reports organ failure (Yes [Y], No [N])

If yes, specify organ failures:

3. Follow-up

a. Reports number of patients made DNR (Yes [Y], No [N])

b. Report follow-up duration (Yes [Y], No [N])

### **Section 4. Hemodynamic and Infection Components**

1. Reports Location of Intervention (Emergency Room [ER], Intensive Care Unit[ICU], Ward[W])

2. If randomized, Report time from onset of sepsis/shock to randomization (Yes [Y], No [N])

3. If randomized, Report therapy (Fluids, pressors etc) administered before randomization (Yes [Y], No [N])

4. Reports number of patients in each arm (Yes [Y], No [N])

5. List all the hemodynamic therapies/ interventions in the intervention arm

6. List all the hemodynamic therapies/ interventions in the comparison arm

7. List all the infection therapies/ interventions in the intervention arm

8. List all the infection therapies/ interventions in the comparison arm

## Section 5. CMS SEP-1 Components

|                                                     | Comparison arm    | Intervention arm  |
|-----------------------------------------------------|-------------------|-------------------|
| <b>N=</b>                                           |                   |                   |
| <b>1. Initial Lactate</b>                           |                   |                   |
| Reported                                            | (Yes [Y], No [N]) | (Yes [Y], No [N]) |
| Measured within 3 hours                             | (Yes [Y], No [N]) | (Yes [Y], No [N]) |
| Time to initial lactate (SD/IQR)                    |                   |                   |
| Lactate value: Mean (SD) or Median (IQR)            |                   |                   |
| Percentage with initial lactate                     |                   |                   |
| <b>2. Broad spectrum antibiotics</b>                |                   |                   |
| Reported                                            | (Yes [Y], No [N]) | (Yes [Y], No [N]) |
| Measured within 3 hours                             | (Yes [Y], No [N]) | (Yes [Y], No [N]) |
| Time to antibiotics, mean/median (SD/IQR)           |                   |                   |
| Percentage with broad spectrum Abx                  |                   |                   |
| <b>3. Blood cultures</b>                            |                   |                   |
| Reported                                            | (Yes [Y], No [N]) | (Yes [Y], No [N]) |
| Performed within 3 hours                            | (Yes [Y], No [N]) | (Yes [Y], No [N]) |
| Time to cultures, mean/median (SD/IQR)              |                   |                   |
| Percentage with blood cultures                      |                   |                   |
| <b>4. Repeat lactate</b>                            |                   |                   |
| Reported                                            | (Yes [Y], No [N]) | (Yes [Y], No [N]) |
| Measured within 6 hours                             | (Yes [Y], No [N]) | (Yes [Y], No [N]) |
| Time to repeat lactate (SD/IQR)                     |                   |                   |
| Lactate value at ___ hrs: Mean (SD) or Median (IQR) |                   |                   |
| Percentage with repeat lactate                      |                   |                   |
| <b>4. 30mL/kg fluid bolus</b>                       |                   |                   |
| Weight reported in study                            | (Yes [Y], No [N]) | (Yes [Y], No [N]) |
| Volume is based on weight in study                  | (Yes [Y], No [N]) | (Yes [Y], No [N]) |
| Fluid bolus infused within 3 hours                  | (Yes [Y], No [N]) | (Yes [Y], No [N]) |
| Time to bolus, mean/median (SD/IQR)                 |                   |                   |
| Volume infused in ___ hrs, mean/ median (SD/IQR)    |                   |                   |
| Percentage with 30mL/kg fluid bolus                 |                   |                   |
| <b>5. Vasopressors</b>                              |                   |                   |
| Given                                               | (Yes [Y], No [N]) | (Yes [Y], No [N]) |
| Started within 6 hours                              | (Yes [Y], No [N]) | (Yes [Y], No [N]) |
| Time to vasopressors, mean/median (SD/IQR)          |                   |                   |
| Dose of vasopressors, mean/median (SD/IQR)          |                   |                   |
| Percentage with vasopressors                        |                   |                   |
| <b>6. Section F</b>                                 |                   |                   |
| Specify component of Section F                      |                   |                   |
| Performed                                           | (Yes [Y], No [N]) | (Yes [Y], No [N]) |
| Performed within 6 hours                            | (Yes [Y], No [N]) | (Yes [Y], No [N]) |
|                                                     |                   |                   |

**Section 6: Statistical Issues**

1. Mortality outcome reported using: [Univariate or Multivariate analysis]

2. Other outcomes reported using: [Univariate or Multivariate analysis]

3. Specify other outcomes reported: \_\_\_\_\_

4. Comparison groups in statistical analysis (select relevant options)

a. Bundle vs. other (Yes [Y], No [N])

If yes then specify other: \_\_\_\_\_

b. Component vs. component (Yes [Y], No [N])

If yes, then specify

i. Component in Intervention arm: \_\_\_\_\_

ii. Component in Comparison arm: \_\_\_\_\_

5. Did study assess compliance across groups (Yes [Y], No [N])

If yes, Compliance in intervention arm: \_\_\_\_\_%

Compliance in comparison arm: \_\_\_\_\_%

6. Were any other interventions performed in this study (Yes [Y], No [N])

If yes, specify: [ ] Educational program/ slide sets

[ ] Quality improvement project

[ ] Sepsis team

[ ] Triage or early sepsis alert

[ ] Electronic reminder

[ ] Other: \_\_\_\_\_

## **Section 7. Bias Assessment: Cochrane Criteria for Randomized Clinical Trials**

### **1. Random sequence generation**

- a) Describes method used to allocate control and treatment group (Yes [Y], No [N])
- b) Method of randomization (Simple [S], Restricted [R], Adaptive [A], Not reported [NR])

### **2. Allocation concealment**

- a) Allocation method was adequately concealed (Yes [Y], No [N])
- b) Allocation Concealment: (sequentially numbered, opaque, sealed envelopes [SNOSE], central randomization [CR], Not reported [NR])

### **3. Blinding of participants**

- a) Study participants were sufficiently blinded to intervention (Yes [Y], No [N])
- b) Blinding (Unblinded [U], Single [S], Double [D], Triple [T], Not reported [NR])

### **4. Blinding of outcome assessment**

- a) Investigators were blinded to outcome (Yes [Y], No [N])

### **5. Incomplete outcome data**

- a) Incomplete outcome data was adequately addressed
- b) All enrolled patients accounted for (Yes [Y], No [N])
- c) Report number of patients screened (flow sheet) (Yes [Y], No [N])
- d) Report number patients excluded (flow sheet) (Yes [Y], No [N])

### **6. Selective reporting**

- a) Reporting of results free from suggestion of selective outcome reporting i.e. protocol was published prior to the study (Yes [Y], No [N])
- b) Report pre-specified primary outcome (Yes [Y], No [N])
- c) Report all pre-specified secondary outcomes (Yes [Y], No [N])
- d) Report adverse outcomes (Yes [Y], No [N])

### **7. Other**

- a. Study was free from other sources of bias (Yes [Y], No [N])
- b. Industry Funding [I], Government Funding (G), Not reported [NR])
- c. Was the trial stopped early (Yes [Y], No [N])
- d. Study plan published (yes [Y], No [N])
- e. Conflicts reported (Yes [Y], No [N])

## **Section 8. Bias Assessment: Newcastle-Ottawa Quality Assessment Scale for Cohort Studies**

Note: A study can be awarded a maximum of one star for each numbered item within the Selection and Outcome categories. A maximum of two stars can be given for Comparability

### **A. Selection**

#### **1) Representativeness of the exposed cohort**

- a) Truly representative of the average cohort of patients with sepsis \*
- b) Somewhat representative of the average cohort of patients with sepsis \*
- c) Selected group of users e.g. nurses, volunteers
- d) No description of the derivation of the cohort

#### **2) Selection of the non-exposed cohort**

- a) Drawn from the same community as the exposed cohort \*
- b) Drawn from a different source
- c) No description of the derivation of the non-exposed cohort

#### **3) Ascertainment of exposure**

- a) Secure record (e.g. medical records) \*
- b) Structured interview \*
- c) Written self report
- d) No description

#### **4) Demonstration that outcome of interest was not present at start of study**

- a) Yes \*
- b) No

### **B. Comparability**

#### **1) Comparability of cohorts on the basis of the design or analysis**

- a) Study performs multivariate analysis that controls for severity of illness \*
- b) Study performs multivariate analysis that controls for ALL of the following: age, co-morbidity, and site of infection \*

### **C. Outcome**

#### **1) Assessment of outcome**

- a) Independent blind assessment \*
- b) Record linkage \*
- c) Self report
- d) No description

#### **2) Was follow-up long enough for outcomes to occur**

- a) Yes (ICU stay, hospital stay, 28d, 30d and 60d considered adequate follow up period for outcome of interest) \*
- b) No

#### **3) Adequacy of follow up of cohorts**

- a) Complete follow up - all subjects accounted for \*
- b) Subjects lost to follow up unlikely to introduce bias; small number lost to follow-up (> 90 % follow up), or description provided of those lost) \*
- c) Follow up rate < 90% and no description of those lost
- d) No statement

**Supplement Table 1:  
Evaluation of Quantity, Quality, and Consistency of Body of Evidence for Structure, Process, and Intermediate Outcome Measures**

| <b>DEFINITION/<br/>RATING</b>                                                                                                                                                                                                                                                                                                                                                                                                                                                                                                                                                                                                                                                                                                                                                                                                                                                                                                                                                                                                                                                                                                         | <b>QUANTITY OF BODY OF<br/>EVIDENCE</b>                                                                                                                                                      | <b>QUALITY OF BODY OF EVIDENCE</b>                                                                                                                                                                                                                                                                                                                                                                                         | <b>CONSISTENCY OF RESULTS OF BODY<br/>OF EVIDENCE</b>                                                                                                                                                                                                                                                                                                                                                                                               |
|---------------------------------------------------------------------------------------------------------------------------------------------------------------------------------------------------------------------------------------------------------------------------------------------------------------------------------------------------------------------------------------------------------------------------------------------------------------------------------------------------------------------------------------------------------------------------------------------------------------------------------------------------------------------------------------------------------------------------------------------------------------------------------------------------------------------------------------------------------------------------------------------------------------------------------------------------------------------------------------------------------------------------------------------------------------------------------------------------------------------------------------|----------------------------------------------------------------------------------------------------------------------------------------------------------------------------------------------|----------------------------------------------------------------------------------------------------------------------------------------------------------------------------------------------------------------------------------------------------------------------------------------------------------------------------------------------------------------------------------------------------------------------------|-----------------------------------------------------------------------------------------------------------------------------------------------------------------------------------------------------------------------------------------------------------------------------------------------------------------------------------------------------------------------------------------------------------------------------------------------------|
| <i>Definition</i>                                                                                                                                                                                                                                                                                                                                                                                                                                                                                                                                                                                                                                                                                                                                                                                                                                                                                                                                                                                                                                                                                                                     | <i>Total number of studies<br/>(not articles or papers)</i>                                                                                                                                  | <i>Certainty or confidence in the<br/>estimates of benefits and harms to<br/>patients across studies in the body of<br/>evidence related to study factors<sup>a</sup><br/>including: study design or flaws;<br/>directness/indirectness to the specific<br/>measure (regarding the population,<br/>intervention, comparators, outcomes);<br/>imprecision (wide confidence intervals<br/>due to few patients or events)</i> | <i>Stability in both the direction and magnitude<br/>of clinically/practically meaningful benefits<br/>and harms to patients (benefit over harms)<br/>across studies in the body of evidence</i>                                                                                                                                                                                                                                                    |
| High                                                                                                                                                                                                                                                                                                                                                                                                                                                                                                                                                                                                                                                                                                                                                                                                                                                                                                                                                                                                                                                                                                                                  | 5+ studies <sup>b</sup>                                                                                                                                                                      | Randomized controlled trials (RCTs) providing direct evidence for the specific measure focus, with adequate size to obtain precise estimates of effect, and without serious flaws that introduce bias                                                                                                                                                                                                                      | Estimates of clinically/practically meaningful benefits and harms to patients are consistent in direction and similar in magnitude across the preponderance of studies in the body of evidence                                                                                                                                                                                                                                                      |
| Moderate                                                                                                                                                                                                                                                                                                                                                                                                                                                                                                                                                                                                                                                                                                                                                                                                                                                                                                                                                                                                                                                                                                                              | 2-4 studies <sup>b</sup>                                                                                                                                                                     | <ul style="list-style-type: none"> <li>• Non-RCTs with control for confounders that could account for other plausible explanations, with large, precise estimate of effect</li> </ul> <p>OR</p> <ul style="list-style-type: none"> <li>• RCTs without serious flaws that introduce bias, but with either indirect evidence or imprecise estimate of effect</li> </ul>                                                      | <p>Estimates of clinically/practically meaningful benefits and harms to patients are consistent in direction across the preponderance of studies in the body of evidence, but may differ in magnitude</p> <p>If only one study, then the estimate of benefits greatly outweighs the estimate of potential harms to patients (one study cannot achieve high consistency rating)</p>                                                                  |
| Low                                                                                                                                                                                                                                                                                                                                                                                                                                                                                                                                                                                                                                                                                                                                                                                                                                                                                                                                                                                                                                                                                                                                   | 1 study <sup>b</sup>                                                                                                                                                                         | <ul style="list-style-type: none"> <li>• RCTs with flaws that introduce bias</li> </ul> <p>OR</p> <ul style="list-style-type: none"> <li>• Non-RCTs with small or imprecise estimate of effect, or without control for confounders that could account for other plausible explanations</li> </ul>                                                                                                                          | <ul style="list-style-type: none"> <li>• Estimates of clinically/practically meaningful benefits and harms to patients differ in both direction and magnitude across the preponderance of studies in the body of evidence</li> </ul> <p>OR</p> <ul style="list-style-type: none"> <li>• Wide confidence intervals prevent estimating net benefit. If only one study, then estimate of benefits do not greatly outweigh harms to patients</li> </ul> |
| Insufficient to Evaluate<br>(See Table 3 for exceptions.)                                                                                                                                                                                                                                                                                                                                                                                                                                                                                                                                                                                                                                                                                                                                                                                                                                                                                                                                                                                                                                                                             | <ul style="list-style-type: none"> <li>• No empirical evidence</li> </ul> <p>OR</p> <ul style="list-style-type: none"> <li>• Only selected studies from a larger body of evidence</li> </ul> | <ul style="list-style-type: none"> <li>• No empirical evidence</li> </ul> <p>OR</p> <ul style="list-style-type: none"> <li>• Only selected studies from a larger body of evidence</li> </ul>                                                                                                                                                                                                                               | No assessment of magnitude and direction of benefits and harms to patients                                                                                                                                                                                                                                                                                                                                                                          |
| <p><sup>a</sup><i>Study designs</i> that affect certainty of confidence in estimates of effect include: randomized controlled trials (RCTs), which control for both observed and unobserved confounders, and non-RCTs (observational studies) with various levels of control for confounders.<br/> <i>Study flaws</i> that may bias estimates of effect include: lack of allocation concealment; lack of blinding; large losses to follow-up; failure to adhere to intention to treat analysis; stopping early for benefit; and failure to report important outcomes.<br/> <i>Imprecision</i> with wide confidence intervals around estimates of effects can occur in studies involving few patients and few events.<br/> <i>Indirectness</i> of evidence includes: indirect comparisons (e.g., two drugs compared to placebos rather than head-to head); and differences between the population, intervention, comparator interventions, and outcome of interest and those included in the relevant studies.</p> <p><sup>b</sup>The suggested number of studies for rating levels of quantity is considered a general guideline.</p> |                                                                                                                                                                                              |                                                                                                                                                                                                                                                                                                                                                                                                                            |                                                                                                                                                                                                                                                                                                                                                                                                                                                     |
| Obtained from page 10 of the NQF's 2013 Review and Update of Guidance for Evaluating Evidence and Measure Testing <sup>8</sup>                                                                                                                                                                                                                                                                                                                                                                                                                                                                                                                                                                                                                                                                                                                                                                                                                                                                                                                                                                                                        |                                                                                                                                                                                              |                                                                                                                                                                                                                                                                                                                                                                                                                            |                                                                                                                                                                                                                                                                                                                                                                                                                                                     |

**Supplement Table 2. Study Characteristics**

| Author (y)                                                                   | Study Design | Number of Patients |                    | Sepsis Type | Study Country   | Number of Study Sites | Location of Patients |
|------------------------------------------------------------------------------|--------------|--------------------|--------------------|-------------|-----------------|-----------------------|----------------------|
|                                                                              |              | Control Group      | Intervention Group |             |                 |                       |                      |
| <b>Studies with serial lactate measurements</b>                              |              |                    |                    |             |                 |                       |                      |
| Jansen ('10) <sup>23</sup>                                                   | RCT          | 67                 | 68                 | SS          | Holland         | 4                     | ICU                  |
| Xiaochun ('15) <sup>24</sup>                                                 | RCT          | 50                 | 50                 | SSh         | China           | 16                    | ICU                  |
| Nguyen ('07) <sup>25</sup>                                                   | OS-CCC       | 253                | 77                 | S           | USA             | 1                     | ED+ICU               |
| Dettmer ('15) <sup>26</sup>                                                  | OS-CCC       | 111                | 132                | SS/SSh      | USA             | 1                     | ED                   |
| McCull ('16) <sup>27</sup>                                                   | OS-BACC      | 167                | 185                | S/SS        | Canada          | 2                     | ED                   |
| <b>Studies with a 30ml/kg fluid infusion</b>                                 |              |                    |                    |             |                 |                       |                      |
| La Rosa ('12) <sup>28</sup>                                                  | OS-CCC       | 24                 | 34                 | SS/SSh      | USA             | 1                     | ICU                  |
| Hayden ('16) <sup>29</sup>                                                   | OS-BACC      | 108                | 130                | S/SSh       | USA             | 1                     | ED                   |
| Leisman 2012* ('16) <sup>30</sup>                                            | OS-CCC       | 4769               | 1050               | SS/SSh      | USA             | 11                    | ED+ICU               |
| Leisman 2014* ('16) <sup>30</sup>                                            | OS-CCC       | 958                | 739                | SS/SSh      | USA             | 1                     | ED+ICU               |
| Leisman 2015* ('16) <sup>30</sup>                                            | OS-CCC       | 5124               | 2115               | SS/SSh      | USA             | 9                     | ED+ICU               |
| Ferreras ('17) <sup>31</sup>                                                 | OS-BACC      | 222                | 222                | S/SSh       | Spain           | 6                     | ED                   |
| Teles ('17) <sup>32</sup>                                                    | OS-CCC       | 46                 | 121                | S/SS/Sh     | Brazil          | 1                     | ICU + Wards          |
| <b>Studies with serial lactate measurements and a 30ml/kg fluid infusion</b> |              |                    |                    |             |                 |                       |                      |
| Liu ('15) <sup>33</sup>                                                      | OS-BACC      | 5942               | 6544               | S           | USA             | 21                    | ED+ICU               |
| Rhodes ('15) <sup>34</sup>                                                   | OS-CCC       | 734                | 90                 | S/SSh       | 62 <sup>†</sup> | 618                   | ED+ICU               |
| Siontis ('15) <sup>35</sup>                                                  | OS-BACC      | 51                 | 41                 | S           | USA             | 1                     | ICU                  |
| Grek ('16) <sup>36</sup>                                                     | OS-BACC      | 25                 | 424                | S           | USA             | 1                     | ED                   |
| <b>Studies assessing fluid responsiveness</b>                                |              |                    |                    |             |                 |                       |                      |
| Hou ('16) <sup>37</sup>                                                      | RCT          | 32                 | 32                 | S           | USA             | 10                    | ED                   |
| Kuan ('16) <sup>38</sup>                                                     | RCT          | 61                 | 61                 | S           | Singapore       | 1                     | ED                   |
| Cronhjort ('17) <sup>39</sup>                                                | RCT          | 18                 | 16                 | SSh         | Sweden          | 1                     | ICU                  |
| <b>Studies assessing SEP-1 Bundle</b>                                        |              |                    |                    |             |                 |                       |                      |
| Ramsdell ('17) <sup>40</sup>                                                 | OS-BACC      | 48                 | 110                | SS/SSh      | USA             | 1                     | ICU + Wards          |

RCT = randomized controlled trial; OS = observational Study; BACC = before and after cohort control; CCC = concurrent cohort control;

S = sepsis; SS = severe sepsis; SSh = septic shock; ED = emergency Department; ICU = intensive care unit

\* one publication included comparisons of control and intervention patients from each of three distinct patient populations admitted to study hospitals over periods ending in either 2012, 2014 or 2016 and each group and comparison was analyzed as a single study here

<sup>†</sup> study conducted in patients from hospitals in 62 different countries from Africa, Asia, Europe, North America, South America and Oceania

**Supplement Table 3. Summary of whether gender, co-morbidities and illness severity were reported in both the intervention and control arms**

| Author (y)                                                                 | Age | Co-morbidities | Illness Severity Score | Type of Illness Severity Score |
|----------------------------------------------------------------------------|-----|----------------|------------------------|--------------------------------|
| <b>Studies with serial lactate measurements</b>                            |     |                |                        |                                |
| Jansen ('10) <sup>23</sup>                                                 | No  | No             | Yes                    | APACHE II                      |
| Xiaochun ('15) <sup>24</sup>                                               | Yes | Yes            | No                     | -                              |
| Nguyen ('07) <sup>25</sup>                                                 | Yes | No             | Yes                    | APACHE II, MEDS, SAPS          |
| Dettmer ('15) <sup>26</sup>                                                | Yes | Yes            | Yes                    | SOFA                           |
| McCull ('16) <sup>27</sup>                                                 | Yes | Yes            | Yes                    | CTAS                           |
| <b>Studies with 30ml/kg fluid infusion</b>                                 |     |                |                        |                                |
| La Rosa ('12) <sup>28</sup>                                                | Yes | No             | Yes                    | MEDS                           |
| Hayden ('16) <sup>29</sup>                                                 | Yes | No             | No                     | -                              |
| Leisman 2012* ('16) <sup>30</sup>                                          | Yes | No             | No                     | -                              |
| Leisman 2014* ('16) <sup>30</sup>                                          | Yes | Yes            | No                     | -                              |
| Leisman 2015* ('16) <sup>30</sup>                                          | Yes | Yes            | No                     | -                              |
| Ferreras ('17) <sup>31</sup>                                               | Yes | Yes            | Yes                    | SOFA                           |
| Teles ('17) <sup>32</sup>                                                  | Yes | Yes            | Yes                    | APACHE II                      |
| <b>Studies with serial lactate measurements and 30ml/kg fluid infusion</b> |     |                |                        |                                |
| Liu ('15) <sup>33</sup>                                                    | Yes | Yes            | Yes                    | LAPS 2                         |
| Rhodes ('15) <sup>34</sup>                                                 | No  | No             | No                     | -                              |
| Siontis ('15) <sup>35</sup>                                                | Yes | No             | Yes                    | APACHE, SOFA                   |
| Grek ('16) <sup>36</sup>                                                   | Yes | No             | Yes                    | APACHE                         |
| <b>Studies with assessment of fluid responsiveness</b>                     |     |                |                        |                                |
| Hou ('16) <sup>37</sup>                                                    | Yes | Yes            | Yes                    | APACHE II, SOFA                |
| Kuan ('16) <sup>38</sup>                                                   | Yes | Yes            | Yes                    | MEDS, MPM, SOFA                |
| Cronhjort ('17) <sup>39</sup>                                              | Yes | Yes            | Yes                    | SAPS3, SOFA                    |
| <b>Studies assessing SEP-1 Bundle</b>                                      |     |                |                        |                                |
| Ramsdell ('17) <sup>40</sup>                                               | Yes | No             | Yes                    | SOFA                           |

APACHE II = Acute Physiology and Chronic Health Evaluation; CTAS = Canadian Triage Acuity Scale; LAPS 2 = Laboratory-Based Acute Physiology Score; MEDS = Mortality in Emergency Department Sepsis (MEDS) score; MPM = Mortality Probabilities Models; NR = not reported; SAPS = Simplified Acute Physiology Score; SOFA = Sequential Organ Failure Assessment (SOFA) Score

\* See Table 1 and text for description of these three cohorts



**Supplement Table 4. Summary of treatments employed in studies**

| Author (y)                                                                   | Treatments and/or Measures           |                                          | Type of Sepsis Bundle <sup>†</sup> |
|------------------------------------------------------------------------------|--------------------------------------|------------------------------------------|------------------------------------|
|                                                                              | Intervention                         | Control                                  |                                    |
| <b>Studies with serial lactate (SL) measurements</b>                         |                                      |                                          |                                    |
| Jansen ('10) <sup>23</sup>                                                   | EGDT with SL                         | EGDT without SL                          | NA                                 |
| Xiaochun ('15) <sup>24</sup>                                                 | EGDT with SL                         | EGDT without SL                          | NA                                 |
| Nguyen ('07) <sup>25</sup>                                                   | Bundle with SL completed             | Bundle with SL not completed             | 6h                                 |
| Dettmer ('15) <sup>26</sup>                                                  | 2 <sup>nd</sup> Lactate obtained     | 2 <sup>nd</sup> Lactate not obtained     | NA                                 |
| McCull ('16) <sup>27</sup>                                                   | Bundle with SL                       | No Bundle                                | 3h                                 |
| <b>Studies with a 30ml/kg fluid infusion</b>                                 |                                      |                                          |                                    |
| La Rosa ('12) <sup>28</sup>                                                  | Bundle with 30mL/kg                  | No Bundle                                | 6h                                 |
| Hayden ('16) <sup>29</sup>                                                   | Bundle with 30mL/kg                  | No Bundle                                | 3h                                 |
| Leisman 2012* ('16) <sup>30</sup>                                            | Bundle with 30mL/kg completed        | Bundle with 30mL/kg not completed        | 3h                                 |
| Leisman 2014* ('16) <sup>30</sup>                                            | Bundle with 30mL/kg completed        | Bundle with 30mL/kg not completed        | 3h                                 |
| Leisman 2015* ('16) <sup>30</sup>                                            | Bundle with 30mL/kg completed        | Bundle with 30mL/kg not completed        | 3h                                 |
| Ferreras ('17) <sup>31</sup>                                                 | Bundle with 30mL/kg completed        | No Bundle                                | 3h                                 |
| Teles ('17) <sup>32</sup>                                                    | Bundle with 30mL/kg completed        | Bundle with 30mL/kg not completed        | 3h                                 |
| <b>Studies with serial lactate measurements and a 30ml/kg fluid infusion</b> |                                      |                                          |                                    |
| Liu ('15) <sup>33</sup>                                                      | Bundle with SL and 30mL/kg           | No Bundle                                | 3h                                 |
| Rhodes ('15) <sup>34</sup>                                                   | Bundle with SL and 30ml/kg Completed | Bundle with SL and 30mL/kg not completed | 6h                                 |
| Siontis ('15) <sup>35</sup>                                                  | CPOE Bundle with SL and 30mL/kg      | No CPOE Bundle                           | 6h                                 |
| Grek ('16) <sup>36</sup>                                                     | Bundle with SL and 30mL/kg           | No Bundle                                | 6h                                 |
| <b>Studies assessing fluid responsiveness</b>                                |                                      |                                          |                                    |
| Hou ('16) <sup>37</sup>                                                      | FR determined with PLR and NiCOM     | Usual care                               | NA                                 |
| Kuan ('16) <sup>38</sup>                                                     | FR determined with FC and NiCOM      | Usual care                               | NA                                 |
| Cronhjort ('17) <sup>39</sup>                                                | FR determined with PLR and PiCCO®    | Usual care                               | NA                                 |
| <b>Studies assessing SEP-1 Bundle</b>                                        |                                      |                                          |                                    |
| Ramsdell ('17) <sup>40</sup>                                                 | SEP-1 Bundle                         | No SEP-1 Bundle                          | 3h + 6h                            |

EGDT = early goal directed therapy; SL = serial lactate measurement; CPOE – computerized physician order entry; NA = not applicable; PLR = passive leg raise; FC = fluid challenges; NiCOM = noninvasive cardiac output monitoring

\* See Table 1 and text for description of these three cohorts

<sup>†</sup> Bundle refers to a group of treatments and/or measurements that septic patients were supposed to receive as quickly as possible within 3 or 6h of presentation

**Supplement Table 5. Treatments and/or measurements compared in intervention and control groups**

| Author (y)                                      | Intervention Group                                                                                                                                                                                                                                                                                                                                                                                                                                                                                                                                           | Control Group                                                                                                                                     |
|-------------------------------------------------|--------------------------------------------------------------------------------------------------------------------------------------------------------------------------------------------------------------------------------------------------------------------------------------------------------------------------------------------------------------------------------------------------------------------------------------------------------------------------------------------------------------------------------------------------------------|---------------------------------------------------------------------------------------------------------------------------------------------------|
| <b>Studies with serial lactate measurements</b> |                                                                                                                                                                                                                                                                                                                                                                                                                                                                                                                                                              |                                                                                                                                                   |
| Jansen ('10) <sup>23</sup>                      | Hemodynamic support targeted to achieve the following: HR<100 BPM, MAP≤60 mmHg, CVP 8–12 mmHg (12–15 with MV) during fluid challenges, UO>0.5 ml/kg/h, SaO <sub>2</sub> ≥92%, Hb≥7.0 g/dl (>10.0g/dl if cardiac ischemia), and ScvO <sub>2</sub> , CR or SE at MDs discretion <b>plus decrease the lactate levels by ≥ 20% every 2h over 8h.</b>                                                                                                                                                                                                             | Hemodynamic support targeted the same goals as in the intervention group but <b>did not include lactate levels.</b>                               |
| Xiaochun ('15) <sup>24</sup>                    | Hemodynamic support targeted to achieve the following within 6h: MAP≥65 mmHg, CVP 8-12 mmHg, UO>0.5 ml/kg-h, ScvO <sub>2</sub> ≥70% plus achieve <b>a lactate clearance of ≥10% or an initial/repeat lactate&lt;2.0 mmol within 6h.</b>                                                                                                                                                                                                                                                                                                                      | Hemodynamic support targeted the same goals as in the control group but <b>did not include lactate clearance or reductions in lactate levels.</b> |
| Nguyen ('07) <sup>25</sup>                      | Bundle completed that included the first three components and either of the last two components: <ul style="list-style-type: none"> <li>- CVP/ScvO<sub>2</sub> monitoring begun within 2h</li> <li>- Give antibiotics within 4h</li> <li>- Attain CVP 8mmHg; SBP 90mmHg or MAP 65mmHg; and ScVO<sub>2</sub> 70% within 6h</li> <li>- Give steroid if patient is on vasopressor or if adrenal insufficiency is suspected</li> <li>- <b>Measure lactate</b></li> </ul>                                                                                         | Bundle not completed                                                                                                                              |
| Dettmer ('15) <sup>26</sup>                     | Initial lactate ≥4mmol/L and <b>second lactate drawn</b> while in the ED                                                                                                                                                                                                                                                                                                                                                                                                                                                                                     | Initial lactate ≥4mmol/L but <b>no second lactate drawn</b> while in the ED                                                                       |
| McColl ('16) <sup>27</sup>                      | Treated with bundle that included: <ul style="list-style-type: none"> <li>- BC, early antibiotics, infection source control</li> <li>- Vital signs q10 min</li> <li>- <b>Measure lactate q2h x 3</b></li> <li>- MV for respiratory failure</li> <li>- <u>If no central line:</u> NS 500ml q15min for goal of HR&lt;100, MAP&gt;65, UO&gt; 0.5ml/kg/hr; NE for MAP&lt;65 after 2L crystalloids</li> <li>- <u>If central line:</u> achieve CVP 8-12mmHg; NE if MAP&lt;65 after 2L crystalloids</li> <li>- Hydrocortisone for persistent hypotension</li> </ul> | Not treated with bundle                                                                                                                           |
| <b>Studies with a 30ml/kg fluid infusion</b>    |                                                                                                                                                                                                                                                                                                                                                                                                                                                                                                                                                              |                                                                                                                                                   |
| La Rosa ('12) <sup>28</sup>                     | Bundle completed that included: <ul style="list-style-type: none"> <li>- Empiric antibiotics by 3h for ED and by 1h for non-ED admissions</li> <li>- Achieve CVP 8–12 mmHg</li> <li>- <b>Administer 30mL/kg over 1h</b> for hypotension and/or lactate &gt;4 mmol/L</li> <li>- Additional fluid if CVP&lt;8 or persistent hypotension</li> <li>- Vasopressors for persistent hypotension despite fluid and/or lactate &gt;4 mmol/L</li> </ul>                                                                                                                | Bundle not completed                                                                                                                              |

|                                   |                                                                                                                                                                                                                                                                                                            |                         |
|-----------------------------------|------------------------------------------------------------------------------------------------------------------------------------------------------------------------------------------------------------------------------------------------------------------------------------------------------------|-------------------------|
| Hayden ('16) <sup>29</sup>        | Treated with bundle that included: <ul style="list-style-type: none"> <li>- Broad-spectrum antibiotics</li> <li>- Obtain BC, lactate, and other labs</li> <li>- <b>Administer 30ml/kg NS bolus via pressure bag</b></li> </ul>                                                                             | Not treated with bundle |
| Leisman 2012* ('16) <sup>30</sup> | Bundle completed that included: <ul style="list-style-type: none"> <li>- BC drawn before antibiotics</li> <li>- Broad-spectrum antibiotics within 180min</li> <li>- Lactate result available within 90min of order</li> <li>- <b>30mL/kg crystalloid bolus</b> initiated within 30min of time 0</li> </ul> | Bundle not completed    |
| Leisman 2014* ('16) <sup>30</sup> | Bundle completed that included: <ul style="list-style-type: none"> <li>- BC drawn before antibiotics</li> <li>- Broad-spectrum antibiotics within 180 min</li> <li>- Lactate result available within 90 min</li> <li>- <b>30mL/kg crystalloid bolus</b> initiated within 30min of time 0</li> </ul>        | Bundle not completed    |
| Leisman 2015* ('16) <sup>30</sup> | Bundle completed that included: <ul style="list-style-type: none"> <li>- BC drawn before antibiotics</li> <li>- Broad-spectrum antibiotics within 180min</li> <li>- Lactate result available within 90min</li> <li>- <b>30mL/kg crystalloid bolus</b> initiated within 30min of time 0</li> </ul>          | Bundle not completed    |
| Ferreras ('17) <sup>31</sup>      | Treated with bundle that included: <ul style="list-style-type: none"> <li>- Antibiotics within 1 hour</li> <li>- Obtain BC before antibiotics, lactate, and other labs</li> <li>- <b>Administer 30ml/kg fluid volume</b></li> </ul>                                                                        | Not treated with bundle |
| Teles ('17) <sup>32</sup>         | Bundle completed that included: <ul style="list-style-type: none"> <li>- Lactate and cultures collection</li> <li>- Broad-spectrum antibiotics within 1hour</li> <li>- <b>Rapid 30mL/kg crystalloid bolus</b></li> </ul>                                                                                   | Bundle not completed    |

**Studies with serial lactate measurements and a 30ml/kg fluid infusion**

|                         |                                                                                                                                                                                                                                                                     |                         |
|-------------------------|---------------------------------------------------------------------------------------------------------------------------------------------------------------------------------------------------------------------------------------------------------------------|-------------------------|
| Liu ('15) <sup>33</sup> | Treated with bundle that included: <ul style="list-style-type: none"> <li>- Administer antibiotics within 3h</li> <li>- <b>Re-measure lactate within 1-4h</b> of initial lactate level</li> <li>- <b>Order 30ml/kg fluids within 3h</b> (or at least 2L)</li> </ul> | Not treated with bundle |
|-------------------------|---------------------------------------------------------------------------------------------------------------------------------------------------------------------------------------------------------------------------------------------------------------------|-------------------------|

|                            |                                                                                                                                                                                                                                                                                                                                                                                                                                                                                                                                                                                                                                                                                                                   |                      |
|----------------------------|-------------------------------------------------------------------------------------------------------------------------------------------------------------------------------------------------------------------------------------------------------------------------------------------------------------------------------------------------------------------------------------------------------------------------------------------------------------------------------------------------------------------------------------------------------------------------------------------------------------------------------------------------------------------------------------------------------------------|----------------------|
| Rhodes ('15) <sup>34</sup> | <p>Bundle completed that included:</p> <p>Within 3h</p> <ul style="list-style-type: none"> <li>- Lactate level measured</li> <li>- BC obtained before antibiotics</li> <li>- Broad-spectrum antibiotics administered</li> <li>- <b>Administer 30mL/kg crystalloids</b> for hypotension or lactate <math>\geq 4</math> mmol/L</li> </ul> <p>Within 6h</p> <ul style="list-style-type: none"> <li>- <b>Re-measure lactate</b> if initial lactate increased</li> <li>- Administer vasopressors for MAP&lt;65mmHg despite initial fluid resuscitation</li> <li>- Measure CVP and ScvO<sub>2</sub> for MAP&lt;65mmHg despite initial fluid resuscitation or the initial lactate <math>\geq 4</math> mmol/L.</li> </ul> | Bundle not completed |
|----------------------------|-------------------------------------------------------------------------------------------------------------------------------------------------------------------------------------------------------------------------------------------------------------------------------------------------------------------------------------------------------------------------------------------------------------------------------------------------------------------------------------------------------------------------------------------------------------------------------------------------------------------------------------------------------------------------------------------------------------------|----------------------|

|                             |                                                                                                                                                                                                                                                                                                                                                                                                                                                                                                                      |                         |
|-----------------------------|----------------------------------------------------------------------------------------------------------------------------------------------------------------------------------------------------------------------------------------------------------------------------------------------------------------------------------------------------------------------------------------------------------------------------------------------------------------------------------------------------------------------|-------------------------|
| Siontis ('15) <sup>35</sup> | <p>Treated with bundle that included:</p> <ul style="list-style-type: none"> <li>- Obtain lactate level</li> <li>- Administer appropriate antibiotics within 1h</li> <li>- <b>Administer 30mL/kg fluid</b></li> <li>- Insert central line</li> <li>- Obtain ScvO<sub>2</sub> every 1-2 h</li> <li>- <b>Re-measure lactate every 1-2h</b></li> <li>- Vasopressor if MAP&lt;65mmHg despite fluids or MAP&lt;50 for <math>\geq 15</math>min</li> <li>- Target ScvO<sub>2</sub>&gt;70% and decreasing lactate</li> </ul> | Not treated with bundle |
|-----------------------------|----------------------------------------------------------------------------------------------------------------------------------------------------------------------------------------------------------------------------------------------------------------------------------------------------------------------------------------------------------------------------------------------------------------------------------------------------------------------------------------------------------------------|-------------------------|

|                          |                                                                                                                                                                                                                                                                                                                                                                                |                         |
|--------------------------|--------------------------------------------------------------------------------------------------------------------------------------------------------------------------------------------------------------------------------------------------------------------------------------------------------------------------------------------------------------------------------|-------------------------|
| Grek ('16) <sup>36</sup> | <p>Treated with bundle that included:</p> <ul style="list-style-type: none"> <li>- <b>Re-measure lactate</b> for initial &gt;4mmol/L</li> <li>- BC prior to antibiotics</li> <li>- Antibiotic administration within 3h</li> <li>- <b>Administer 30mL/kg fluid</b></li> <li>- Place central venous line if lactate &gt;4</li> <li>- Measure CVP and ScvO<sub>2</sub></li> </ul> | Not treated with bundle |
|--------------------------|--------------------------------------------------------------------------------------------------------------------------------------------------------------------------------------------------------------------------------------------------------------------------------------------------------------------------------------------------------------------------------|-------------------------|

#### Studies assessing fluid responsiveness

|                         |                                                                                                                                                                                                                                                                                                                                                                                                                                                                                                                                                                                                                                                                                                                                                                                                                                                                   |                                                                                                                                                          |
|-------------------------|-------------------------------------------------------------------------------------------------------------------------------------------------------------------------------------------------------------------------------------------------------------------------------------------------------------------------------------------------------------------------------------------------------------------------------------------------------------------------------------------------------------------------------------------------------------------------------------------------------------------------------------------------------------------------------------------------------------------------------------------------------------------------------------------------------------------------------------------------------------------|----------------------------------------------------------------------------------------------------------------------------------------------------------|
| Hou ('16) <sup>37</sup> | <p>Patients had fluid responsiveness tested with <b>sequential fluid challenges and NiCOM measures</b> as follows:</p> <ul style="list-style-type: none"> <li>- Every 1h for up to 4h patients challenged with 5mL/kg fluid and SV measured before and after fluid with NiCOM</li> <li>- Patients were considered fluid responsive if SV increased by 10% by the end of or within 5 min of fluid challenge</li> <li>- Fluid responsive patients received a 1L crystalloid infusion over a 30 to 60min period</li> <li>- Protocol stopped after four cycles or a stopping point met (e.g. worsening respiratory status or new hypotension/vasopressor use)</li> <li>- Patients remained eligible for fluid administration if initial testing was negative but subsequent testing was positive</li> <li>- Serum lactate was measured initially and at 4h</li> </ul> | Treatment at discretion of the treating physician but required an initial and repeat lactate at 4h but <b>could not include cardiac output measures.</b> |
|-------------------------|-------------------------------------------------------------------------------------------------------------------------------------------------------------------------------------------------------------------------------------------------------------------------------------------------------------------------------------------------------------------------------------------------------------------------------------------------------------------------------------------------------------------------------------------------------------------------------------------------------------------------------------------------------------------------------------------------------------------------------------------------------------------------------------------------------------------------------------------------------------------|----------------------------------------------------------------------------------------------------------------------------------------------------------|

|                               |                                                                                                                                                                                                                                                                                                                                                                                                                                                                                                                                                                                                                                                                                                                                                                                                               |                                                                                                                                                                                                                                                |
|-------------------------------|---------------------------------------------------------------------------------------------------------------------------------------------------------------------------------------------------------------------------------------------------------------------------------------------------------------------------------------------------------------------------------------------------------------------------------------------------------------------------------------------------------------------------------------------------------------------------------------------------------------------------------------------------------------------------------------------------------------------------------------------------------------------------------------------------------------|------------------------------------------------------------------------------------------------------------------------------------------------------------------------------------------------------------------------------------------------|
| Kuan ('16) <sup>38</sup>      | <p>Patients had fluid responsive tested with <b>sequential passive leg raise maneuvers and NiCOM measures</b> as follows:</p> <ul style="list-style-type: none"> <li>- Before resuscitation and then 30min after each fluid treatment patients underwent a passive leg raise maneuver and SVI was measured immediately before and at the end of the leg raise with NiCOM</li> <li>- Patients were considered fluid responsive if SVI increased by &gt; 10%</li> <li>- Patients with an increase in SVI &gt;20% received 1000mL crystalloid</li> <li>- Patients with an increase in SVI &gt;10% and &lt;20% received 500mL crystalloid</li> <li>- Change in SVI ≤10% and MAP ≥65 mm Hg were the hemodynamic goals</li> <li>- Vasopressors were started for change in SVI &lt;10% and MAP &lt;65mmHg</li> </ul> | Treatment at discretion of the treating physician in accordance with current best practice including the administration of intravenous fluids, vasopressors, and inotropes to attain an MAP ≥65 mmHg. <b>No passive leg-raising maneuvers.</b> |
| Cronhjort ('17) <sup>39</sup> | <p>Patients had fluid responsiveness tested with <b>sequential fluid challenges and PICCO®</b> as follows:</p> <ul style="list-style-type: none"> <li>- Protocol applied when physician considered it necessary to administer a fluid bolus</li> <li>- Before resuscitation, patients underwent a passive leg raise maneuver and MAP, CI, SVI was measured immediately before and at the end of the leg raise with PICCO®</li> <li>- Patients were considered fluid responsive if SVI increased by ≥ 10%</li> <li>- Patients with an increase in SVI ≥20% received fluid volume and rate at clinician discretion</li> <li>- Patients with an increase in SVI &lt;10% did not receive fluid administration</li> </ul>                                                                                          | Treatment at discretion of the treating physician but not allowed to perform passive leg raise tests.                                                                                                                                          |

**Studies Assessing SEP-1 Bundle**

|                              |                                                                                                                                                                                                                                                                                                                                                                                                                                                                                                                                                                                                                                                                                         |                                                                                   |
|------------------------------|-----------------------------------------------------------------------------------------------------------------------------------------------------------------------------------------------------------------------------------------------------------------------------------------------------------------------------------------------------------------------------------------------------------------------------------------------------------------------------------------------------------------------------------------------------------------------------------------------------------------------------------------------------------------------------------------|-----------------------------------------------------------------------------------|
| Ramsdell ('17) <sup>40</sup> | <p>Patients received SEP-1 Bundle including:</p> <p><b>3-hour</b></p> <ul style="list-style-type: none"> <li>- Initial lactate level measurement</li> <li>- Broad spectrum or other antibiotics administered</li> <li>- Blood cultures drawn prior to antibiotics</li> <li>- Resuscitation with 30 ml/kg crystalloid fluids if septic shock</li> </ul> <p><b>6-hour</b></p> <ul style="list-style-type: none"> <li>- Repeat lactate level measurement only if initial lactate level is elevated (≥2mmol/L)</li> <li>- Vasopressors for persistent hypotension</li> <li>- Volume status and tissue perfusion assessment if persistent hypotension or initial lactate ≥4mmol/L</li> </ul> | Patients did not receive SEP-1 Bundle but managed according to treating physician |
|------------------------------|-----------------------------------------------------------------------------------------------------------------------------------------------------------------------------------------------------------------------------------------------------------------------------------------------------------------------------------------------------------------------------------------------------------------------------------------------------------------------------------------------------------------------------------------------------------------------------------------------------------------------------------------------------------------------------------------|-----------------------------------------------------------------------------------|

HR = heart rate; BPM = beat per minute; MAP = mean arterial blood pressure; CVP = central venous pressure; UO = urine output; SaO2 = arterial blood oxygen saturation; Hb = hemoglobin; ScvO2 = central venous oxygen saturation; CR = capillary refill; SE = skin exam; ED = emergency department; BC = blood culture; MV = mechanical ventilation; NS = normal saline; NE = norepinephrine; NiCOM = noninvasive cardiac output monitor; CI: cardiac index; SV = stroke volume; SVI = stroke volume index  
 \* See Table 1 and text for description of these three cohorts

**Supplement Table 6. Summary of the outcomes reported in analyzed studies**

| Author                                                                     | Primary Endpoint      | Secondary Endpoint(s)                                | Mortality Definition | Adjusted Mortality Reported | Variables Adjusted for in Multivariate Analysis | Assessed Adverse Events <sup>†</sup> |
|----------------------------------------------------------------------------|-----------------------|------------------------------------------------------|----------------------|-----------------------------|-------------------------------------------------|--------------------------------------|
| <b>Studies with serial lactate measurements</b>                            |                       |                                                      |                      |                             |                                                 |                                      |
| Jansen ('10) <sup>23</sup>                                                 | M                     | ILOS, HLOS                                           | HM                   | NA                          | NA                                              | No                                   |
| Xiaochun ('15) <sup>24</sup>                                               | M                     | MV duration, ILOS                                    | 28d M                | NA                          | NA                                              | No                                   |
| Nguyen ('07) <sup>25</sup>                                                 | Comp.                 | M, HLOS                                              | HM                   | Yes                         | Acute illness, bundle components                | No                                   |
| Dettmer ('15) <sup>26</sup>                                                | 28d M                 | SOFA; ILOS; VFd; VPFd                                | 28d M                | No                          | Not reported                                    | No                                   |
| McCull ('16) <sup>27</sup>                                                 | 30d M                 | Time to MD assessment, therapy and LC, ICU admit, VP | 30d M                | Yes                         | Age, Acute Illness, Co-morbidities              | No                                   |
| <b>Studies with 30ml/kg fluid infusion</b>                                 |                       |                                                      |                      |                             |                                                 |                                      |
| La Rosa ('12) <sup>28</sup>                                                | Comp.                 | M                                                    | HM                   | Yes                         | Age, Acute Illness                              | No                                   |
| Hayden ('16) <sup>29</sup>                                                 | Time to interventions | M                                                    | HM                   | No                          | NR                                              | No                                   |
| Leisman 2012* ('16) <sup>30</sup>                                          | HM                    | ICU admit, VP                                        | HM                   | Yes                         | Age, Acute Illness                              | No                                   |
| Leisman 2014 *('16) <sup>30</sup>                                          | HM                    | ICU admit, VP, HLOS, HC                              | HM                   | Yes                         | Age, Acute Illness, Co-morbidities              | No                                   |
| Leisman 2015* ('16) <sup>30</sup>                                          | HM                    | ICU admit, ILOS, VP, MV, HLOS, HC                    | HM                   | Yes                         | Age, Acute Illness, Co-morbidities              | No                                   |
| Ferreras ('17) <sup>31</sup>                                               | 30d M                 | HM, Comp                                             | 30d M                | No                          | NR                                              | No                                   |
| Teles ('17) <sup>32</sup>                                                  | M                     | ILOS                                                 | HM                   | Yes                         | Age, Acute Illness, Co-morbidities              | No                                   |
| <b>Studies with serial lactate measurements and 30ml/kg fluid infusion</b> |                       |                                                      |                      |                             |                                                 |                                      |
| Liu ('15) <sup>33</sup>                                                    | HM                    | -                                                    | HM                   | Yes                         | Age, Sex, Acute Illness, Co-morbidities         | No                                   |
| Rhodes ('15) <sup>34</sup>                                                 | M and Comp.           | -                                                    | HM                   | Yes                         | ICU admission, Acute Illness                    | No                                   |
| Siontis ('15) <sup>35</sup>                                                | Comp.                 | M, LOS                                               | 30d M                | No                          | NR                                              | No                                   |
| Grek ('16) <sup>36</sup>                                                   | Comp.                 | HM, CLABSI                                           | HM                   | No                          | NR                                              | No                                   |
| <b>Studies with assessment of fluid responsiveness</b>                     |                       |                                                      |                      |                             |                                                 |                                      |
| Hou ('16) <sup>37</sup>                                                    | SOFA                  | M; fluids; LC                                        | NR                   | NA                          | NA                                              | No                                   |
| Kuan ('16) <sup>38</sup>                                                   | LC                    | M, LOS, HC, VP                                       | 28d HM               | NA                          | NA                                              | Yes<br>(Intubation rate)             |
| Cronhjort ('17) <sup>39</sup>                                              | Weight gain           | M, ILOS; fluids                                      | 30d M                | NA                          | NA                                              | No                                   |
| <b>Studies Assessing SEP-1 Bundle</b>                                      |                       |                                                      |                      |                             |                                                 |                                      |
| Ramsdell ('17) <sup>40</sup>                                               | Comp.                 | HLOS, ILOS, HM                                       | HM                   | No                          | NR                                              | No                                   |

mortality: M = mortality; HM = hospital mortality; 28d M = 28-day mortality; 30d M = 30-day mortality; NR = not reported; NA = not applicable; length of stay: LOS = length of stay; ILOS = ICU length of stay; HLOS = hospital length of stay; CLABSI = central line associated bloodstream infection; Comp. = compliance; fluids = volume of fluids infused; HC = hospital cost; ICU admit = ICU admission; LC = lactate clearance; MV = mechanical ventilation duration; RS = resuscitation success; SOFA = Sequential Organ Failure Assessment; VFd = ventilator free days; VP = vasopressor; VPFd = vasopressor free days  
\* See Table 1 and text for description of these three cohorts; <sup>†</sup> Assessed adverse events = fluid overload or cardiac events reported for both the control and intervention arms

**Supplement Table 7. Adjunctive Aids**

|                                                                               | Adjunctive Aid <sup>†</sup> | Prioritized Care Aid |                   |                     | Educational Aid    |
|-------------------------------------------------------------------------------|-----------------------------|----------------------|-------------------|---------------------|--------------------|
|                                                                               |                             | Sepsis Alert         | Expedited consult | Screening checklist | Lectures/ Meetings |
| <b>Studies with Serial Lactate Measurements</b>                               |                             |                      |                   |                     |                    |
| Jansen ('10) <sup>23</sup>                                                    | No                          | -                    | -                 | -                   | -                  |
| Xiaochun ('15) <sup>24</sup>                                                  | No                          | -                    | -                 | -                   | -                  |
| Nguyen ('07) <sup>25</sup>                                                    | Yes                         | -                    | -                 | +                   | +                  |
| Dettmer ('15) <sup>26</sup>                                                   | No                          | -                    | -                 | -                   | -                  |
| McCull ('16) <sup>27</sup>                                                    | Yes                         | +                    | +                 | +                   | -                  |
| <b>Studies with 30 mL/kg Fluid Infusion</b>                                   |                             |                      |                   |                     |                    |
| La Rosa ('12) <sup>28</sup>                                                   | Yes                         | +                    | -                 | -                   | -                  |
| Hayden ('16) <sup>29</sup>                                                    | Yes                         | +                    | -                 | -                   | -                  |
| Leisman 2012* ('16) <sup>30</sup>                                             | Yes                         | +                    | -                 | -                   | -                  |
| Leisman 2014* ('16) <sup>30</sup>                                             | Yes                         | +                    | -                 | -                   | -                  |
| Leisman 2015* ('16) <sup>30</sup>                                             | Yes                         | +                    | -                 | -                   | -                  |
| Ferreras ('17) <sup>31</sup>                                                  | Yes                         | +                    | -                 | +                   | +                  |
| Teles ('17) <sup>32</sup>                                                     | No                          | -                    | -                 | -                   | -                  |
| <b>Studies with Serial Lactate Measurements and a 30 mL/kg Fluid Infusion</b> |                             |                      |                   |                     |                    |
| Liu ('15) <sup>33</sup>                                                       | Yes                         | -                    | -                 | -                   | +                  |
| Rhodes ('15) <sup>34</sup>                                                    | No                          | -                    | -                 | -                   | -                  |
| Siontis ('15) <sup>35</sup>                                                   | Yes                         | -                    | -                 | +                   | +                  |
| Grek ('16) <sup>36</sup>                                                      | Yes                         | +                    | +                 | -                   | -                  |
| <b>Studies Assessing Fluid Responsiveness</b>                                 |                             |                      |                   |                     |                    |
| Hou ('16) <sup>37</sup>                                                       | No                          | -                    | -                 | -                   | -                  |
| Kuan ('16) <sup>38</sup>                                                      | No                          | -                    | -                 | -                   | -                  |
| Cronhjort ('17) <sup>39</sup>                                                 | No                          | -                    | -                 | -                   | -                  |
| <b>Studies Assessing SEP-1 Bundle</b>                                         |                             |                      |                   |                     |                    |
| Ramsdell ('17) <sup>40</sup>                                                  | Yes                         | +                    | -                 | +                   | +                  |

\* See Table 1 and text for description of these three cohorts

<sup>†</sup> Adjunctive aids included prioritized care aids (e.g. sepsis pager/alert systems, expedited sepsis consults and sepsis checklists/ triage systems) or educational aids introduced to improve recognition or management of septic patients by providers (e.g. lectures or meetings)



Supplement Table 8. Risk of bias assessment for analyzed studies

A. Randomized Clinical Trials (Cochrane Risk of Bias Tool)

| Author (y)                                                                          | Selection Bias             |                        | Performance Bias                       | Detection Bias                 | Attrition Bias                    | Reporting Bias              |
|-------------------------------------------------------------------------------------|----------------------------|------------------------|----------------------------------------|--------------------------------|-----------------------------------|-----------------------------|
|                                                                                     | Random Sequence generation | Allocation concealment | Blinding of participants and personnel | Blinding of outcome assessment | Incomplete outcome data addressed | Free of Selective reporting |
| <b>Studies of serial lactate measurements</b>                                       |                            |                        |                                        |                                |                                   |                             |
| Jansen ('10) <sup>23</sup>                                                          | Yes                        | Yes                    | No                                     | No                             | UK                                | UK <sup>  </sup>            |
| Xiaochun ('15) <sup>24</sup>                                                        | Yes                        | No                     | No                                     | No                             | No <sup>†</sup>                   | UK                          |
| <b>Studies of fluid responsiveness with passive leg raising or fluid challenges</b> |                            |                        |                                        |                                |                                   |                             |
| Hou ('16) <sup>37</sup>                                                             | Yes                        | UK                     | No                                     | No                             | No <sup>†</sup>                   | Yes                         |
| Kuan ('16) <sup>38</sup>                                                            | Yes                        | UK                     | No                                     | No                             | Yes                               | UK                          |
| Cronhjort ('17) <sup>39</sup>                                                       | Yes                        | UK                     | No                                     | No                             | Yes                               | UK                          |

B. Observational Studies (Newcastle-Ottawa Tool)

| Author (y)                                                               | Selection Bias                                              |                                                          |                                  | Comparability Bias <sup>†</sup>    |                                                         | Outcome Bias <sup>‡</sup>                         |                          |                       |
|--------------------------------------------------------------------------|-------------------------------------------------------------|----------------------------------------------------------|----------------------------------|------------------------------------|---------------------------------------------------------|---------------------------------------------------|--------------------------|-----------------------|
|                                                                          | Intervention Group Represents at Risk Patients <sup>§</sup> | Control Group From Same Population as Intervention Group | Data Obtained from Secure Source | Controlled for Severity of Illness | Controlled for co-morbidity, age, and site of infection | Mortality Assessed Blindly or from Record Linkage | ≥ 28d Mortality Reported | Adequacy of follow-up |
| <b>Studies of serial lactate measurements</b>                            |                                                             |                                                          |                                  |                                    |                                                         |                                                   |                          |                       |
| Nguyen ('07) <sup>25</sup>                                               | UK                                                          | Yes                                                      | Yes                              | No                                 | No                                                      | Yes                                               | No **                    | UK                    |
| Dettmer ('15) <sup>26</sup>                                              | Yes                                                         | Yes                                                      | Yes                              | No                                 | No                                                      | UK                                                | Yes                      | UK                    |
| McCull ('16) <sup>27</sup>                                               | Yes                                                         | Yes                                                      | Yes                              | No                                 | No                                                      | Yes                                               | Yes                      | Yes                   |
| <b>Studies of 30mL/kg fluid infusion</b>                                 |                                                             |                                                          |                                  |                                    |                                                         |                                                   |                          |                       |
| La Rosa ('12) <sup>28</sup>                                              | Yes                                                         | Yes                                                      | Yes                              | Yes                                | No                                                      | Yes                                               | No **                    | UK                    |
| Hayden ('16) <sup>29</sup>                                               | Yes                                                         | Yes                                                      | Yes                              | No                                 | No                                                      | Yes                                               | No **                    | UK                    |
| Leisman 2012* ('16) <sup>30</sup>                                        | Yes                                                         | Yes                                                      | Yes                              | Yes                                | No                                                      | Yes                                               | No **                    | Yes                   |
| Leisman 2014 * ('16) <sup>30</sup>                                       | Yes                                                         | Yes                                                      | Yes                              | Yes                                | No                                                      | Yes                                               | No **                    | Yes                   |
| Leisman 2015* ('16) <sup>30</sup>                                        | Yes                                                         | Yes                                                      | Yes                              | Yes                                | No                                                      | Yes                                               | No **                    | Yes                   |
| Ferreras ('17) <sup>31</sup>                                             | Yes                                                         | Yes                                                      | Yes                              | No                                 | No                                                      | Yes                                               | Yes                      | UK                    |
| Teles ('17) <sup>32</sup>                                                | Yes                                                         | Yes                                                      | Yes                              | Yes                                | No                                                      | Yes                                               | No **                    | UK                    |
| <b>Studies of serial lactate measurements and 30mL/kg fluid infusion</b> |                                                             |                                                          |                                  |                                    |                                                         |                                                   |                          |                       |
| Liu ('15) <sup>33</sup>                                                  | Yes                                                         | Yes                                                      | Yes                              | Yes                                | No                                                      | Yes                                               | Yes                      | UK                    |
| Rhodes ('15) <sup>34</sup>                                               | UK                                                          | Yes                                                      | UK                               | Yes                                | No                                                      | UK                                                | No **                    | UK                    |
| Siontis ('15) <sup>35</sup>                                              | UK                                                          | UK                                                       | Yes                              | No                                 | No                                                      | UK                                                | Yes                      | UK                    |
| Grek ('16) <sup>36</sup>                                                 | Yes                                                         | No                                                       | Yes                              | No                                 | No                                                      | Yes                                               | No **                    | UK                    |
| <b>Studies of SEP-1 Bundle</b>                                           |                                                             |                                                          |                                  |                                    |                                                         |                                                   |                          |                       |
| Ramsdell ('17) <sup>40</sup>                                             | Yes                                                         | Yes                                                      | Yes                              | No                                 | No                                                      | Yes                                               | No **                    | UK                    |

---

UK = unknown; \* See Table 1 and text for description of these three cohorts; † mortality adjusted for severity of acute illness or co-morbid conditions including all of the following: age, chronic illness and site of infection; ‡ mortality at  $\geq 28$ d was considered long enough follow-up and reports had to state that follow-up was adequate; § randomly selected patients or all consecutively encountered patients; || Did not report adverse events; ¶ Study did not provide flowsheet showing patients screened or reasons for exclusion after screening; \*\* Reported mortality less than 28-d mortality

**Supplement Table 9. Reported Organ Dysfunction at Baseline and Administered Interventions in SEP-1 Bundle study <sup>40</sup>**

|                                                                                         | Control arm<br>(n=48) | Intervention arm<br>(n=110) |
|-----------------------------------------------------------------------------------------|-----------------------|-----------------------------|
| <b>Reported Organ dysfunction, n (%)</b>                                                |                       |                             |
| Hypotension (SBP < 90mmHg or MAP < 65mmHg)                                              | 37 (77)               | 58 (53) <sup>  </sup>       |
| Serum creatinine (> 2mg/dL)                                                             | 23 (48)               | 31 (28) <sup>  </sup>       |
| Acute respiratory failure (mechanical ventilation)                                      | 15 (31)               | 25 (23)                     |
| <b>Reported Interventions, n (%)</b>                                                    |                       |                             |
| 1. Initial Lactate                                                                      |                       |                             |
| <i>Measured within 3 hours</i>                                                          | 30 (63)               | 97 (88) <sup>  </sup>       |
| 2. Broad spectrum antibiotics                                                           |                       |                             |
| <i>Administered within 3 hours</i>                                                      | 39 (81)               | 99 (90)                     |
| <i>Time to antibiotics, mean/median (SD/IQR)</i>                                        | NR                    | NR                          |
| 3. Blood cultures                                                                       |                       |                             |
| <i>Performed within 3 hours</i>                                                         | 44 (92)               | 97 (88)                     |
| 4. 30mL/kg fluid bolus                                                                  |                       |                             |
| <i>Administered within 3 hours if septic shock *</i>                                    | 7 (37)                | 27 (71) <sup>  </sup>       |
| <i>Actual volume of administered fluid</i>                                              | NR                    | NR                          |
| 5. Repeat lactate                                                                       |                       |                             |
| <i>Re-measured within 6 hours if initial lactate &gt; 2mmol/L †</i>                     | 10 (32)               | 55 (81) <sup>  </sup>       |
| <i>Change in therapy due to result of repeat lactate level</i>                          | NR                    | NR                          |
| 6. Vasopressors                                                                         |                       |                             |
| <i>Started within 6 hours if persistent hypotension ‡</i>                               | 3 (60)                | 5 (63)                      |
| 7. Volume status and tissue perfusion assessment                                        |                       |                             |
| <i>Performed within 6 hours if persistent hypotension and/or lactate &gt; 4mmol/L §</i> | 0 (0)                 | 8 (35) <sup>  </sup>        |
| <i>Focused examination performed within 6 hours</i>                                     | NR                    | NR                          |
| <i>Bedside ultrasound performed within 6 hours</i>                                      | NR                    | NR                          |
| <i>Fluid responsiveness performed within 6 hours</i>                                    | NR                    | NR                          |
| 8. Adjunctive Aids                                                                      |                       |                             |
| <i>Priority Care Aids</i>                                                               | -                     | +                           |
| <i>Educational Aids</i>                                                                 | -                     | +                           |
| <b>Reported Outcome, n (%)</b>                                                          |                       |                             |
| <i>In-hospital mortality</i>                                                            | 13 (27)               | 16 (15)                     |

NR = not reported

\* Control group (n=19), Intervention group (n=38)

† Control group (n=31), Intervention group (n=69)

‡ Control group (n=5), Intervention group (n=8)

§ Control group (n=19), Intervention group (n=38)

<sup>||</sup> P <0.050

**Supplement Table 10. Summary of studies registered in clinicaltrials.gov that address SEP-1's individual interventions \***

| NCT Number  | Study name | Study Description                                                                                       | Location    | Recruitment | Mortality is Primary Outcome | Study Start Date | Status                                                        | Comments                   |
|-------------|------------|---------------------------------------------------------------------------------------------------------|-------------|-------------|------------------------------|------------------|---------------------------------------------------------------|----------------------------|
| NCT00270673 | -          | Early lactate-directed therapy vs. hemodynamic support without lactate levels                           | Netherlands | 135         | Yes                          | February 2006    | Completed and published Jansen <i>et al.</i> <sup>23</sup>    | -                          |
| NCT01484106 | COMMIT     | Fluid responsiveness using passive leg raise and NICOM vs. Usual care                                   | USA         | 65          | No                           | November 2011    | Completed and published Hou <i>et al.</i> <sup>37</sup>       | -                          |
| NCT01453270 | AGONIST    | Fluid responsiveness using passive leg raise and NICOM vs. Usual care                                   | Singapore   | 122         | No                           | November 2011    | Completed and published Kuan <i>et al.</i> <sup>38</sup>      | -                          |
| NCT02301585 | OFTaPLR    | Fluid responsiveness using passive leg raise vs. Usual care                                             | Sweden      | 34          | No                           | February 2014    | Completed and published Cronhjort <i>et al.</i> <sup>39</sup> | Terminated due to futility |
| NCT02346331 | -          | Fluid boluses guided by physical examination vs. Usual care                                             | Kenya       | 198         | No                           | January 2015     | Active, completed enrolment August 2016                       | Awaiting publication       |
| NCT02846948 | ECHOCARD   | Echo guided fluid resuscitation vs. Usual care                                                          | Lithuania   | 160         | No                           | January 2016     | Active, anticipated completion: February 2018                 | -                          |
| NCT02354742 | ECHO RCT   | Echo guided fluid resuscitation vs. early goal directed therapy                                         | USA         | 80          | No                           | December 2014    | Active, anticipated completion: June 2018                     | -                          |
| NCT03020407 | -          | Titrated (10±5mL/kg) fluid therapy strategy using IVC ultrasound vs. Fixed (30mL/kg) fluid strategy     | Thailand    | 254         | Yes                          | January 2017     | Active, anticipated completion: April 2019                    | -                          |
| NCT03214913 | -          | Titrated (10±5mL/kg) fluid therapy strategy using clinician judgment vs. Fixed (30mL/kg) fluid strategy | China       | 550         | Yes                          | January 2018     | Active, anticipated completion: June 2021                     | -                          |

\* As of December 11 2017, no trials were registered in clinicaltrials.gov that assess the SEP-1 Bundle in its entirety

## PROSPERO International prospective register of systematic reviews

---

### Evidence for the hemodynamic interventions in the SEP-1 performance measure

*Dominique Pepper, Junfeng Sun, Judith Welsh, Charles Natanson, Peter Eichacker*

---

#### Citation

Dominique Pepper, Junfeng Sun, Judith Welsh, Charles Natanson, Peter Eichacker. Evidence for the hemodynamic interventions in the SEP-1 performance measure. PROSPERO 2016:CRD42016052716 Available from [http://www.crd.york.ac.uk/PROSPERO\\_REBRANDING/display\\_record.asp?ID=CRD42016052716](http://www.crd.york.ac.uk/PROSPERO_REBRANDING/display_record.asp?ID=CRD42016052716)

#### Review question(s)

In patients with sepsis, does the published literature show an improved survival with the use of the hemodynamic interventions included in the Center for Medicare and Medicaid Service's (CMS) Severe Sepsis and Septic Shock Early Management Bundle performance measure (SEP-1)?

#### Searches

We will perform a systematic search of MEDLINE, EMBASE, Scopus and the Web of Science for relevant citations of published studies through November 30, 2016 using individualized search strategies prepared for each database.

Also, to identify ongoing or planned trials of adults with sepsis, severe sepsis or septic shock, we will search ClinicalTrials.gov.

#### Types of study to be included

We will include randomized and observational studies of adults presenting with sepsis, severe sepsis or septic shock, and that compare the survival effects of the interventions noted above either individually or when combined in a bundle, to a control group. We anticipate that most studies will be observational studies and that a minority will be randomized controlled trials (RCTs). RCTs and observational studies will be analyzed separately. For observational studies, we will perform subgroup analysis using only studies that provide multivariate analyses accounting for comorbidities and severity of illness if such studies are available.

#### Condition or domain being studied

The National Quality Forum (NQF) endorsed and CMS has instituted a performance measure to be applied to patients presenting with sepsis termed the Severe Sepsis and Septic Shock Early Management Bundle (SEP-1). The primary purpose of this performance measure is to decrease hospital mortality and costs of care related to sepsis, severe sepsis and septic shock. The performance measure includes five interventions (both treatments and measures) related to the hemodynamic management of patients with sepsis: In adults with severe sepsis, initial lactate level measurement must be performed within 3 hours of presentation, and repeat lactate level measurement must be performed within 6 hours of presentation, if initial lactate level is elevated. In adults with septic shock, resuscitation with 30ml/kg crystalloid fluids must be performed within 3 hours of presentation. Within 6 hours of presentation of septic shock, adults must receive vasopressors if hypotension persists after fluid administration. Also, if hypotension persists after fluid administration or if the initial lactate level is > 4 mmol/L, then a volume status and tissue perfusion assessment must be performed. According to the CMS performance measure, assessment of volume status and tissue perfusion requires either a focused physical exam (vital signs, cardiopulmonary exam, capillary refill evaluation, peripheral pulse assessment and skin examination – all must be performed), or any two of the following: measure CVP, measure ScvO<sub>2</sub>, bedside cardiovascular ultrasound, or passive leg raise or fluid challenge. At present CMS requires that providers report on their institution's use of the interventions in this performance measure. Subsequently, however, CMS will require that providers complete all interventions. This performance measure is complex and requires substantial hospital resources to achieve compliance. Our systematic review and meta-analysis will focus on the evidence supporting the use of each of these hemodynamic interventions in decreasing mortality from sepsis, as well as the length of hospital stay, organ failure and cost of care.

Our primary question is:

---

Do published studies show that these interventions either individually or when combined in a bundle decrease mortality when compared to a control group?

### **Participants/ population**

We will include adults (at least 18 years old) requiring early management (within 6 hours of presentation) of sepsis, severe sepsis or septic shock. The definitions of sepsis, severe sepsis and septic shock for each study will be recorded. Each study must include at least one intervention and one control group, and outcome of interest (see below). The control group will be those that do not receive the intervention or those that receive usual care.

### **Intervention(s), exposure(s)**

The Severe Sepsis and Septic Shock Early Management Bundle includes five hemodynamic interventions either as measures or treatments:

1. Initial lactate level measurement within 3 hours of severe sepsis presentation;
2. Repeat lactate level measurement within 6 hours of severe sepsis presentation, only if initial lactate level is elevated;
3. Resuscitation with 30 ml/kg crystalloid fluids within 3 hours of septic shock presentation;
4. Administration of vasopressors within 6 hours of septic shock presentation, only if hypotension persists after fluid administration;
5. A volume status and tissue perfusion assessment within 6 hours of septic shock presentation, only if hypotension persists after fluid administration or initial lactate > 4 mmol/L.

Volume status and tissue perfusion assessment consists of either:

A. A focused exam including:

- Vital signs; AND
- Cardiopulmonary exam; AND
- Capillary refill evaluation; AND
- Peripheral pulse evaluation; AND
- Skin examination.

OR

B. Any two of the following four:

- Central venous pressure measurement;
- Central venous oxygen measurement;
- Bedside cardiovascular ultrasound;
- Passive leg raise or fluid challenge.

We will assess the evidence supporting the survival benefit of each of these hemodynamic interventions. Each component in the volume status and tissue perfusion assessment will also be examined individually.

### **Comparator(s)/ control**

The control group will be those that do not receive the intervention or those that receive usual care.

## **Outcome(s)**

### **Primary outcomes**

Hospital survival (or 30-day or 60-day or 90-day or ICU survival, prioritized in that order).

### **Secondary outcomes**

1. Length of hospitalization;
2. Costs of care;
3. Organ failure.

## **Data extraction, (selection and coding)**

A standardized form will be made for data abstraction. The following data will be extracted from original articles: the name of the first author; publication year; country; study design; sample size; study period; mean age of study population; male percentage; sepsis definition; sepsis site (pulmonary, urinary tract, or soft tissue); severity of illness (e.g. APACHE, SAP scores); comorbid illnesses (e.g. diabetes, COPD, cancer, immunodeficiency) and lifestyle factors (e.g. smoking, ethanol use); study setting (i.e. emergency department, intensive care unit or hospital ward); inclusion of the performance measure interventions either individually or in a bundle; type of control group not receiving the intervention; time from presentation of sepsis to when the interventions were performed; survival; length of hospitalization; development of organ injury and costs of care. Data used for meta-analysis will include the numbers of survivors and non-survivors. When the report has only one outcome, we will contact the authors for other outcome data.

## **Risk of bias (quality) assessment**

Two independent reviewers will assess papers selected for potential risk of bias. Any disagreements that arise between the reviewers will be resolved through discussion, or with a third reviewer. We will use the Newcastle-Ottawa Scale for evaluation of observational studies (before-after, cohort or case-controlled studies). This scale comprises eight items that evaluate the quality of observational studies regarding selection, comparability and outcome/exposure. For randomized controlled trials, we will use the Cochrane Collaboration's risk of bias assessment tool. This tool assesses selection bias (random sequence generation and allocation concealment), performance bias (blinding of personnel and participants), detection bias (blinding of outcome assessment), attrition bias (incomplete outcome data) and reporting bias (selective reporting). We will assess its effect by doing subgroup analysis based on the risk of bias.

## **Strategy for data synthesis**

Studies will be grouped according to priority, as follows: i) study design (randomized controlled trial vs. observational study), ii) whether the intervention or its component parts (listed above) were investigated as part of a bundle or as an individual intervention, and iii) the particular hemodynamic intervention. For each group, the study characteristics (including their specific study design, study details and a description of the number and characteristics of the study participants included) will be presented in summary tables. For the analysis, we will perform separate subgroup analyses for each study design, bundle/intervention if sufficient numbers of studies are available. Otherwise, an attempt will be made to model the effect of each intervention if we can reasonably assume their effects are additive.

Risk ratios [RR] of mortality will be analyzed using random-effects models, with 0.5 added to zero cells. Heterogeneity among studies will be assessed statistically using the standard Q statistic and I-squared values. Subgroup analyses based on different study designs and/or patient characteristics (e.g. age, severity of illness, comorbidities, etc.) will be performed if appropriate. Publication bias will be assessed by funnel plot and Egger's regression.

## **Analysis of subgroups or subsets**

Subgroup analyses based on different study designs and/or patient characteristics (e.g. age, severity of illness, comorbidities, etc.) will be performed if appropriate.

## **Contact details for further information**

Dominique Pepper

Critical Care Medicine Department

National Institutes of Health

10 Center Drive, Room 2C145

Bethesda, MD 20892

dominiquepepper@gmail.com

**Organisational affiliation of the review**

National Institutes of Health

**Review team**

Dr Dominique Pepper,

Dr Junfeng Sun,

Dr Judith Welsh,

Dr Charles Natanson,

Dr Peter Eichacker,

**Anticipated or actual start date**

07 December 2016

**Anticipated completion date**

31 May 2017

**Funding sources/sponsors**

Intramural research funding from the Clinical Center, National Institutes of Health.

**Conflicts of interest**

None known

**Language**

English

**Country**

United States of America

**Subject index terms status**

Subject indexing assigned by CRD

**Subject index terms**

Hemodynamics; Humans; Outcome Assessment (Health Care); Quality of Health Care; Sepsis; Shock, Septic; Treatment Outcome

**Stage of review**

Ongoing

**Date of registration in PROSPERO**

08 December 2016

**Date of publication of this revision**

08 December 2016



| <b>Stage of review at time of this submission</b>               | <b>Started</b> | <b>Completed</b> |
|-----------------------------------------------------------------|----------------|------------------|
| Preliminary searches                                            | Yes            | Yes              |
| Piloting of the study selection process                         | No             | No               |
| Formal screening of search results against eligibility criteria | No             | No               |
| Data extraction                                                 | No             | No               |
| Risk of bias (quality) assessment                               | No             | No               |
| Data analysis                                                   | No             | No               |

---

**PROSPERO**

**International prospective register of systematic reviews**

The information in this record has been provided by the named contact for this review. CRD has accepted this information in good faith and registered the review in PROSPERO. CRD bears no responsibility or liability for the content of this registration record, any associated files or external websites.

---
